# Supplementary material for: Work-related adverse events leaving their mark: a cross-sectional study among Dutch gynecologists
Source: PubMed Central journal article supplement (PMC5863895; doi:10.1186/s12888-018-1659-1), 2018-03-22
Supplement: 12888_2018_1659_MOESM1_ESM.pdf [file 12888_2018_1659_MOESM1_ESM.pdf]

Welkom bij de vragenlijst over de impact van belastende gebeurtenissen op de werkvloer.

Start de vragenlijst

Start

[www.thesistools.com](http://www.thesistools.com)

1.

**Geslacht\***

- Vrouw
- Man

2.

**Leeftijd\***

- 25-34 jaar
- 35-44 jaar
- 45-54 jaar
- 55-64 jaar
- 65 jaar of ouder

3.

**Huidige functie\***

- AIOS
- Specialist / fellow
- Gynaecoloog in ruste
- Niet praktiserend / managementfunctie

4.

**Aantal jaren werkzaam (geweest) binnen gynaecologie/obstetrie (inclusief werk als A(N)IOS)\***

5.

**Ik heb ooit overwogen te stoppen met het vak gynaecologie/obstetrie\***

- Helemaal mee oneens
- Oneens
- Eens
- Helemaal mee eens

6.

**Indien u ooit overwoog te stoppen met gynaecologie/obstetrie, wat was de belangrijkste reden daarvoor?\***

- Belangrijkste reden:
- Nooit overwogen te stoppen

7.

**Er is ooit een klacht tegen mij ingediend bij het tuchtcollege\***

- Nee  
 Ja

8.

**De emotioneel meest belastende momenten van mijn werk vind ik (meerdere antwoorden mogelijk):**

- Niet van toepassing  
 Als ik slecht nieuws moet brengen  
 De kritieke momenten waarop een patiënt in levensgevaar is  
 Als een patiënt van me overlijdt  
 Als ik een diagnose over het hoofd heb gezien  
 Als ik het gevoel heb dat ik een patiënt niet kon helpen  
 Als ik twijfel of ik wel de juiste beslissingen neem  
 Anders, namelijk:

9.

**Na het meemaken van de meest emotioneel belastende momenten die ik heb meegemaakt in de gynaecologie/obstetrie heb ik het volgende gedaan (meerdere antwoorden mogelijk):**

- Niet van toepassing  
 Professionele psychische hulp zoeken  
 Zo snel mogelijk naar huis gaan  
 Meer dan normaal alcohol, drugs of sigaretten gebruiken  
 Medicatie gebruiken die ik normaal zelden/niet gebruik  
 Geprobeerd er niet aan te denken  
 Afleiding gezocht, proberen bezig te blijven  
 Gebeden of mij tot andere religieuze activiteiten gewend  
 Er een formele case review van gemaakt (complicatie-bespreking perinatale audit, SIRE procedure, melding IGZ)  
 Gesport of mij beziggehouden met mijn hobby  
 Er over gepraat met vrienden/familie

- Informeel erover gepraat met collega's
- Ik ontwikkelde klachten passend bij een burn-out (Bv: emotionele uitputting, depersonalisatie, verminderd zelfvertrouwen)
- Mij ziekgemeld
- Ik ben gestopt met verloskunde/gynaecologie
- Anders, namelijk:

10.

**Ik vind de huidige vorm van opvang na belastende gebeurtenissen goed\***

- Helemaal mee oneens
- Oneens
- Eens
- Helemaal mee eens

11.

**Er is binnen mijn afdeling ruimte voor emoties na het meemaken van een emotioneel belastende gebeurtenis tijdens het werk\***

- Helemaal mee oneens
- Oneens
- Eens
- Helemaal mee eens

12.

**Het leren omgaan met emoties na emotioneel belastende gebeurtenissen heb ik (meerdere antwoorden mogelijk):**

- Middels onderwijs tijdens mijn opleiding tot basisarts geleerd.
- Middels onderwijs tijdens mijn opleiding tot specialist geleerd.
- Middels geaccrediteerde cursussen/trainingen in het kader van mijn nascholing als specialist geleerd

Bij intervisie geleerd

Op een andere manier geleerd, namelijk:

Nooit echt geleerd

13.

**Ik heb naar aanleiding van patiëntgerelateerde nare gebeurtenissen mijn werkomstandigheden aangepast (bijv: geen diensten meer, geen vaginale stuitbevallingen meer, niet meer alleen opereren, meer/snel in huis komen ipv. telefonische supervisie) \***

Helemaal mee oneens

Oneens

Eens

Helemaal mee eens

14.

**In de loop van mijn carrière ben ik defensiever geworden in mijn vakkundig handelen \***

Helemaal mee oneens

Oneens

Eens

Helemaal mee eens

15.

**Nadat ik een belastende gebeurtenis op de werkvloer had meegemaakt bestond de opvang uit: \***

16.

**Op mijn afdeling is er een protocol cq. vaste aanpak voor nazorg na belastende gebeurtenissen.\***

Nee

Weet ik niet

Ja, dit bestaat uit:

17.

**Na het meemaken van een belastende gebeurtenis zou ik het liefst opvang krijgen in de vorm van:**

Evaluatie met directe collega's

Intervisie met niet-directe collega's (geen gynaecologen, wel artsen)

1 op 1 gesprekken met een psycholoog of coach

Een buddy

Anders, namelijk

18.

**Als je wakker ligt van heftige gebeurtenissen tijdens je werk ben je niet gemaakt voor dit vak\***

Helemaal mee oneens.

Oneens

Eens

Helemaal mee eens

19.

**Ik zou een cultuurverandering binnen de gynaecologie wat betreft de opvang na belastende gebeurtenissen stimuleren, ongeacht of ik het zelf nodig heb\***

Helemaal mee oneens

- Oneens
- Eens
- Helemaal mee eens

Volgende pagina

[www.thesistools.com](http://www.thesistools.com)

**Soms maken mensen zeer ingrijpende gebeurtenissen mee, zoals in een levensbedreigende situatie terecht komen door een ramp, een ernstig ongeluk of een brand; bedreigd of aangevallen worden; aangerand of verkracht worden; zien dat iemand vermoord wordt, of dood is, of ernstig gewond is; of horen dat er iets afschuwelijks is gebeurd met iemand die u na aan het hart ligt.**

Als arts kan men ingrijpende patiëntenzorggerelateerde gebeurtenissen meemaken: (dreiging van) overlijden of ernstig letsel van een patiënt, maar ook bedreiging door een patiënt of familie.

20.

- 1) Heeft u ooit TIJDENS UW WERK ALS GYNAECOLOOG soortgelijke dingen meegemaakt?**
- 2) Reageerde u bij tenminste één van deze gebeurtenissen met intense angst, hulpeloosheid of afschuw?
- 3) Heeft/hebben deze gebeurtenis(sen) minimaal 4 weken geleden plaatsgevonden?\*

- Ik heb alledrie de vragen met ja beantwoord
- Nee, ik heb niet alledrie de vragen met ja beantwoord

Volgende pagina

[www.thesistools.com](http://www.thesistools.com)

**Bekijk de onderstaande reacties die soms ontstaan na een traumatische gebeurtenis. Deze vragenlijst gaat over uw persoonlijke reactie op de traumatische gebeurtenis die u heeft meegemaakt. Geef aan (Ja / Nee) of u tenminste TWEEemaal in de AFGELOPEN WEEK het volgende heeft ondervonden**

NB Het gaat om uw persoonlijke reactie nu op de traumatische gebeurtenis.

21.

**Verontrustende gedachten of herinneringen aan de gebeurtenis die in uw hoofd opkomen tegen uw wil in\***

Nee

Ja

22.

**Verontrustende dromen over de gebeurtenis\***

Nee

Ja

23.

**U gedragen of u voelen alsof de gebeurtenis opnieuw plaatsvindt\***

Nee

Ja

24.



**Van streek raken door dingen die u aan de gebeurtenis herinneren\***

- Nee
- Ja

25.

**Lichamelijke reacties (zoals snelle hartslag, steen in de maag, zweten, duizeligheid) wanneer u herinnerd wordt aan de gebeurtenis\***

- Nee
- Ja

26.

**Moeilijk in slaap kunnen komen of te vroeg wakker worden\***

- Nee
- Ja

27.

**Geïrriteerdheid of woedeaanvallen\***

- Nee
- Ja

28.

**Moeite hebben met concentreren\***

- Nee

Ja

29.

**Verhoogd bewustzijn van mogelijke gevaren voor uzelf en anderen \***

Nee

Ja

30.

**Gespannen zijn of schrikken van iets onverwachts \***

Nee

Ja

31.

**Kunt u de situatie waarover u de bovenstaande vragen beantwoord heeft kort beschrijven?**

32.

**Het is mogelijk dat u bij bovenstaande vragen 'nee' invult wat betreft afgelopen week, maar dat u veel van bovenstaande symptomen in een EERDERE PERIODE in uw leven ervaren heeft na een gebeurtenis op uw werk. \***

Nee, ik herken de symptomen niet

Ja, ik herken minstens 6 symptomen uit een eerdere periode in mijn leven

Volgende pagina

[www.thesistools.com](http://www.thesistools.com)

**Deze pagina dient ervoor om te weten te komen hoe u zich voelt. Lees iedere vraag goed door en geef uw antwoord aan met een kruisje in het hokje dat het beste weergeeft hoe u zich gedurende de afgelopen week gevoeld heeft.**

Denk niet te lang na over een antwoord. Het gaat bij deze uitspraken om uw eigen indruk. Er bestaan geen foute antwoorden, elk antwoord is goed, zolang het maar uw eigen indruk weergeeft.

33.

**Ik voel me gespannen\***

- Meestal
- Vaak
- Af en toe, soms
- Helemaal niet

34.

**Ik geniet nog steeds van de dingen waar ik vroeger van genoot\***

- Zeker zo veel
- Wel wat minder
- Duidelijk minder
- Eigenlijk nauwelijks nog

35.

**Ik heb een soort angstgevoel alsof er iets vreselijks zal gebeuren\***

- Jazeker, en vrij erg
- Ja, maar niet zo erg
- Een beetje, maar het hindert me niet
- Helemaal niet

36.

**Ik kan best lachen en de dingen van de vrolijke kant zien\***

- Net zoveel als vroeger
- Nu wel wat minder
- Duidelijk minder
- Helemaal niet

37.

**Ik maak me ongerust\***

- Heel erg vaak
- Vaak
- Af en toe, maar niet zo vaak
- Heel soms

38.

**Ik voel me opgewekt\***

- Helemaal niet
- Heel af en toe
- Soms
- Meestal

39.

**Ik kan best rustig zitten en me ontspannen\***

- Jazeker
- Meestal
- Af en toe
- Helemaal niet

40.

**Ik heb het gevoel dat alles moeizamer gaat\***

- Bijna altijd
- Heel vaak
- Soms
- Helemaal niet

41.

**Ik heb een soort angstig, gespannen gevoel in mijn buik\***

- Helemaal niet
- Soms
- Vrij vaak
- Heel vaak

42.

**Het interesseert me niet meer hoe ik eruit zie\***

- Inderdaad, helemaal niet meer
- Niet meer zoveel als eigenlijk zou moeten
- Het interesseert me wel, maar iets minder dan vroeger
- Het interesseert me nog net zoveel als vroeger

43.

**Ik ben onrustig en voel dat ik iets te doen moet hebben\***

- Inderdaad, heel duidelijk
- Duidelijk
- Enigszins
- Helemaal niet

44.

**Ik verheug me van tevoren op dingen die komen gaan\***

- Net zoveel als vroeger
- Een beetje minder dan vroeger
- Veel minder dan vroeger
- Bijna nooit

45.

**Ik raak plotseling in paniek\***

- Inderdaad, zeer vaak
- Tamelijk vaak

- Soms
- Helemaal nooit

46.

**Ik kan van een goed boek genieten, of van zoiets als een radio- of televisieprogramma\***

- Vaak
- Tamelijk vaak
- Af en toe
- Zelden

Naar laatste pagina

[www.thesistools.com](http://www.thesistools.com)

47.

**Ruimte voor opmerkingen aangaande dit onderwerp:**

**Dank voor uw deelname!**

Verstuur mijn antwoorden

Dank voor uw deelname!
